# Supplementary material for: Silibinin decreases hepatic glucose production through the activation of gut–brain–liver axis in diabetic rats
Source: Royal Society of Chemistry journal article supplement (doi:10.1039/c8fo00565f), 2018-01-01
Supplement: c8fo00565f1.pdf [file c8fo00565f1.pdf]

## Supplemental Data

Supplemental Figure 1. Representative images and quantitative results of PAS staining of skeletal muscle from SP•ZF rats with silibinin or metformin treatment. NS, not significant; Sili, Silibinin; Met, Metformin. Data are mean  $\pm$  SEM (n=6 in each group).

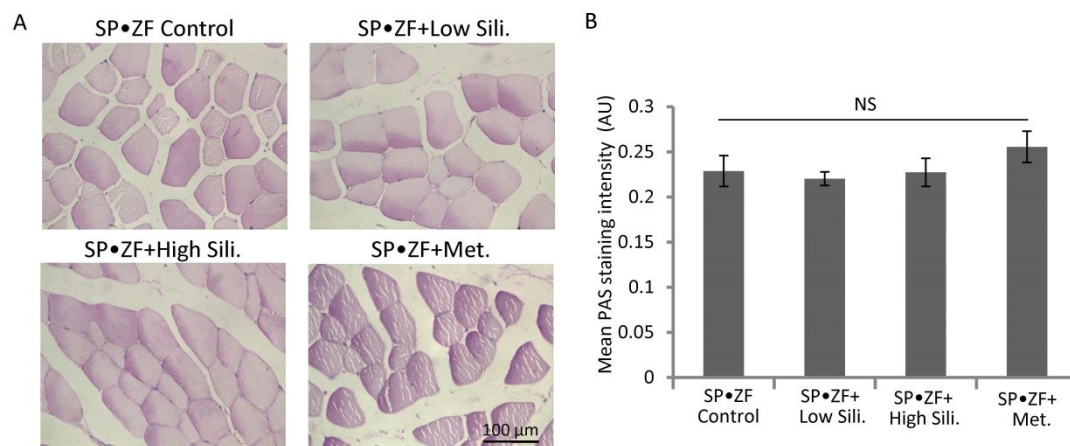

Supplemental Table 1. Fasting blood glucose and body weight of normoglycemic and diabetic model rats one week after streptozotocin injection.

| Parameters                     | NPD           | HFD + STZ      |
|--------------------------------|---------------|----------------|
| Fasting blood glucose (mmol/L) | 2.82 ± 0.14   | 11.97 ± 0.52*  |
| Body weight (g)                | 243.78 ± 5.24 | 261.43 ± 3.65* |

Values are mean ± SEM (n=8 in NPD group; n=40 in HFD + STZ group). The abbreviations denote NPD: normal pellet food, HFD: high-fat diet, STZ: streptozotocin. \* $P < 0.05$  vs. normoglycemic SD rats fed with NPD.
